# Supplementary material for: Regioselectivity control of graphene functionalization by ripples
Source: Royal Society of Chemistry journal article supplement (doi:10.1039/c1cp22491c), 2011-01-01
Supplement: c1cp22491c.pdf [file c1cp22491c.pdf]

## Supporting Information

for

### Regioselectivity Control of Graphene Functionalization by Ripples

Xingfa Gao,<sup>a</sup> Ying Wang,<sup>b</sup> Xin Liu,<sup>c</sup> T.-L. Chan,<sup>d</sup> Stephan Irle,<sup>\*b</sup> Yuliang Zhao,<sup>a</sup> and Shengbai B. Zhang<sup>\*e</sup>

#### S1. Profiles of the rippled graphene sheets

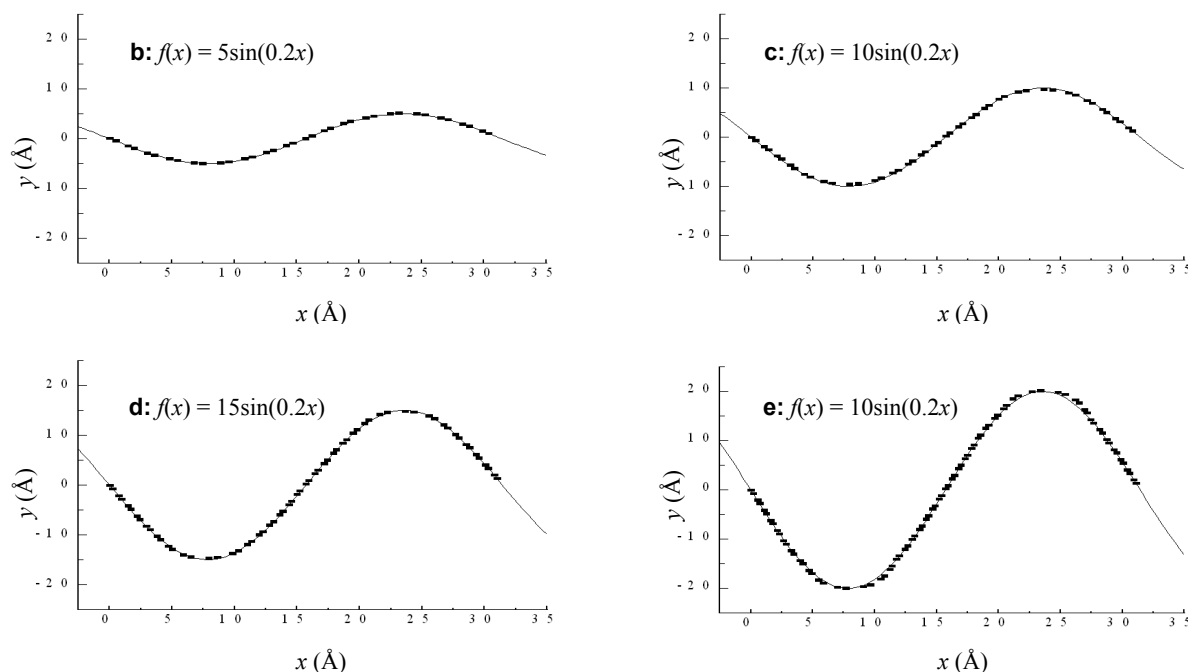

**Figure S1.** The comparative illustrations of the calculated profiles of the rippled graphene sheets and the ideal sine functions. Dark squares: The side-view profiles of rippled graphene sheets (b–e) optimized at GGA-PBE/DZP level. Smooth curves: curves of the respective sine functions of the figures.

#### S2. Optimized Cartesian Coordinates (GGA-PBE/DZP)

**a,  $y = 0$**

|   |         |         |         |
|---|---------|---------|---------|
| C | 0.66996 | 0.52562 | 0.49150 |
| C | 1.38041 | 0.48778 | 1.73537 |
| C | 2.80345 | 0.48601 | 1.73850 |

|   |          |         |         |
|---|----------|---------|---------|
| C | 3.51441  | 0.52046 | 0.49377 |
| C | 4.95454  | 0.56933 | 0.49302 |
| C | 5.67671  | 0.56823 | 1.73772 |
| C | 7.09791  | 0.51512 | 1.73504 |
| C | 7.81170  | 0.48537 | 0.48991 |
| C | 9.24217  | 0.47654 | 0.48941 |
| C | 9.96577  | 0.47848 | 1.73252 |
| C | 11.39868 | 0.47952 | 1.73157 |
| C | 12.11395 | 0.47853 | 0.48839 |
| C | 13.53653 | 0.49419 | 0.48992 |
| C | 14.25467 | 0.53544 | 1.73400 |
| C | 15.69399 | 0.57093 | 1.73600 |
| C | 16.41072 | 0.58088 | 0.49192 |
| C | 17.83397 | 0.58285 | 0.49072 |
| C | 18.55017 | 0.58292 | 1.73493 |
| C | 19.98109 | 0.58229 | 1.73316 |
| C | 20.70506 | 0.58130 | 0.48886 |
| C | 22.13535 | 0.58525 | 0.48821 |
| C | 22.84796 | 0.58846 | 1.73148 |
| C | 24.27479 | 0.58564 | 1.73072 |
| C | 24.99602 | 0.58329 | 0.48750 |
| C | 26.43758 | 0.58543 | 0.48916 |
| C | 27.14817 | 0.59013 | 1.73347 |
| C | 28.57239 | 0.58845 | 1.73665 |
| C | 29.28413 | 0.57446 | 0.49250 |

LatticeVectors

|           |            |          |
|-----------|------------|----------|
| 30.057602 | 0.000000   | 0.000000 |
| 0.000000  | 100.000000 | 0.000000 |
| 0.000000  | 0.000000   | 2.487311 |

**b**,  $y = 5\sin(0.2x)$

|   |          |          |          |
|---|----------|----------|----------|
| C | 0.05579  | -0.03604 | 1.19371  |
| C | 0.55570  | 0.46830  | -0.05169 |
| C | 1.52613  | 1.51069  | -0.05176 |
| C | 2.02186  | 2.01763  | 1.19362  |
| C | 3.08038  | 2.96606  | 1.19367  |
| C | 3.63626  | 3.38908  | -0.05171 |
| C | 4.85796  | 4.12288  | -0.05170 |
| C | 5.48555  | 4.44076  | 1.19369  |
| C | 6.81763  | 4.94220  | 1.19368  |
| C | 7.50831  | 5.05387  | -0.05174 |
| C | 8.93191  | 4.95073  | -0.05191 |
| C | 9.59992  | 4.74256  | 1.19346  |
| C | 10.87612 | 4.11277  | 1.19331  |
| C | 11.46464 | 3.72099  | -0.05213 |
| C | 12.60893 | 2.87769  | -0.05217 |
| C | 13.14837 | 2.43816  | 1.19324  |
| C | 14.20720 | 1.49233  | 1.19327  |

|   |          |          |          |
|---|----------|----------|----------|
| C | 14.72014 | 1.00458  | -0.05212 |
| C | 15.76376 | 0.03604  | -0.05196 |
| C | 16.26366 | -0.46832 | 1.19351  |
| C | 17.23405 | -1.51076 | 1.19369  |
| C | 17.72975 | -2.01774 | -0.05169 |
| C | 18.78840 | -2.96608 | -0.05136 |
| C | 19.34431 | -3.38909 | 1.19414  |
| C | 20.56593 | -4.12303 | 1.19428  |
| C | 21.19361 | -4.44082 | -0.05112 |
| C | 22.52578 | -4.94223 | -0.05117 |
| C | 23.21643 | -5.05387 | 1.19420  |
| C | 24.64001 | -4.95072 | 1.19400  |
| C | 25.30800 | -4.74257 | -0.05142 |
| C | 26.58417 | -4.11278 | -0.05150 |
| C | 27.17263 | -3.72098 | 1.19386  |
| C | 28.31688 | -2.87767 | 1.19379  |
| C | 28.85633 | -2.43816 | -0.05162 |
| C | 29.91516 | -1.49235 | -0.05166 |
| C | 30.42811 | -1.00460 | 1.19373  |

LatticeVectors

31.4159 0.0000 0.0000  
0.0000 100.0000 0.0000  
0.0000 0.0000 2.490814

$c, y = 10\sin(0.2x)$

|   |          |         |          |
|---|----------|---------|----------|
| C | 0.05166  | 0.13099 | 1.24285  |
| C | 0.37529  | 0.77307 | 0.00002  |
| C | 1.08232  | 2.02842 | 0.00001  |
| C | 1.42304  | 2.65660 | 1.24283  |
| C | 2.13562  | 3.90661 | 1.24283  |
| C | 2.47208  | 4.53707 | 0.00000  |
| C | 3.18197  | 5.79072 | 0.00000  |
| C | 3.52596  | 6.42191 | 1.24282  |
| C | 4.32834  | 7.62955 | 1.24282  |
| C | 4.78354  | 8.18404 | 0.00000  |
| C | 5.90306  | 9.10364 | 0.00001  |
| C | 6.55141  | 9.41786 | 1.24283  |
| C | 7.97970  | 9.63291 | 1.24283  |
| C | 8.68821  | 9.52339 | 0.00001  |
| C | 9.98696  | 8.89802 | 0.00000  |
| C | 10.52813 | 8.42576 | 1.24282  |
| C | 11.47471 | 7.34752 | 1.24282  |
| C | 11.89800 | 6.76976 | -0.00001 |
| C | 12.70053 | 5.57379 | -0.00003 |
| C | 13.04999 | 4.94958 | 1.24278  |
| C | 13.76425 | 3.70047 | 1.24277  |
| C | 14.10316 | 3.07101 | -0.00006 |
| C | 14.80881 | 1.81498 | -0.00009 |

|   |          |          |          |
|---|----------|----------|----------|
| C | 15.13247 | 1.17295  | 1.24273  |
| C | 15.75962 | -0.13137 | 1.24272  |
| C | 16.08328 | -0.77330 | -0.00011 |
| C | 16.79033 | -2.02851 | -0.00008 |
| C | 17.13103 | -2.65664 | 1.24275  |
| C | 17.84357 | -3.90660 | 1.24277  |
| C | 18.18000 | -4.53702 | -0.00005 |
| C | 18.88984 | -5.79056 | -0.00004 |
| C | 19.23373 | -6.42166 | 1.24278  |
| C | 20.03577 | -7.62914 | 1.24279  |
| C | 20.49056 | -8.18374 | -0.00003 |
| C | 21.60925 | -9.10349 | -0.00002 |
| C | 22.25683 | -9.41773 | 1.24281  |
| C | 23.68314 | -9.63311 | 1.24281  |
| C | 24.39041 | -9.52461 | -0.00001 |
| C | 25.69301 | -8.90707 | 0.00000  |
| C | 26.24175 | -8.45009 | 1.24283  |
| C | 27.18243 | -7.35915 | 1.24282  |
| C | 27.60723 | -6.78300 | 0.00000  |
| C | 28.40485 | -5.57794 | 0.00001  |
| C | 28.75575 | -4.95203 | 1.24284  |
| C | 29.47110 | -3.70176 | 1.24284  |
| C | 29.81035 | -3.07187 | 0.00003  |
| C | 30.51652 | -1.81557 | 0.00003  |
| C | 30.84031 | -1.17355 | 1.24285  |

LatticeVectors

|          |           |         |
|----------|-----------|---------|
| 31.41590 | 0.00000   | 0.00000 |
| 0.00000  | 100.00000 | 0.00000 |
| 0.00000  | 0.00000   | 2.48564 |

$d_y = 15\sin(0.2x)$

|   |         |          |          |
|---|---------|----------|----------|
| C | 0.05423 | 0.16122  | 1.18837  |
| C | 0.27182 | 0.85961  | -0.05182 |
| C | 0.76875 | 2.22103  | -0.05178 |
| C | 1.00671 | 2.90039  | 1.18842  |
| C | 1.50865 | 4.25935  | 1.18845  |
| C | 1.73949 | 4.94945  | -0.05176 |
| C | 2.23870 | 6.31167  | -0.05179 |
| C | 2.46916 | 7.00600  | 1.18840  |
| C | 2.99061 | 8.35705  | 1.18833  |
| C | 3.28287 | 9.01858  | -0.05186 |
| C | 3.83021 | 10.35493 | -0.05181 |
| C | 4.12986 | 11.01204 | 1.18840  |
| C | 4.73317 | 12.32669 | 1.18844  |
| C | 5.06483 | 12.96651 | -0.05174 |
| C | 5.93659 | 14.10812 | -0.05172 |
| C | 6.54317 | 14.50688 | 1.18846  |
| C | 7.96169 | 14.74969 | 1.18844  |

|   |          |           |          |
|---|----------|-----------|----------|
| C | 8.66532  | 14.61020  | -0.05178 |
| C | 9.87021  | 13.81313  | -0.05182 |
| C | 10.32864 | 13.26683  | 1.18836  |
| C | 11.06067 | 12.02979  | 1.18831  |
| C | 11.37801 | 11.38298  | -0.05189 |
| C | 11.99123 | 10.07061  | -0.05186 |
| C | 12.29549 | 9.41539   | 1.18835  |
| C | 12.84541 | 8.07847   | 1.18842  |
| C | 13.13667 | 7.41430   | -0.05178 |
| C | 13.65878 | 6.06131   | -0.05171 |
| C | 13.89239 | 5.36766   | 1.18848  |
| C | 14.38772 | 4.00046   | 1.18843  |
| C | 14.60498 | 3.29840   | -0.05178 |
| C | 15.03056 | 1.91284   | -0.05178 |
| C | 15.24814 | 1.21127   | 1.18842  |
| C | 15.74456 | -0.15441  | 1.18849  |
| C | 15.97805 | -0.84499  | -0.05169 |
| C | 16.48010 | -2.20562  | -0.05162 |
| C | 16.71644 | -2.88618  | 1.18857  |
| C | 17.21726 | -4.24733  | 1.18862  |
| C | 17.44653 | -4.94245  | -0.05159 |
| C | 17.94574 | -6.30662  | -0.05162 |
| C | 18.17717 | -7.00057  | 1.18856  |
| C | 18.69878 | -8.35274  | 1.18850  |
| C | 18.99077 | -9.01611  | -0.05171 |
| C | 19.53747 | -10.35354 | -0.05177 |
| C | 19.83603 | -11.01135 | 1.18845  |
| C | 20.43399 | -12.32819 | 1.18847  |
| C | 20.76964 | -12.96692 | -0.05171 |
| C | 21.64351 | -14.10745 | -0.05169 |
| C | 22.25009 | -14.50645 | 1.18851  |
| C | 23.66815 | -14.74997 | 1.18846  |
| C | 24.37196 | -14.61037 | -0.05174 |
| C | 25.57672 | -13.81257 | -0.05188 |
| C | 26.03601 | -13.26635 | 1.18833  |
| C | 26.76855 | -12.02879 | 1.18833  |
| C | 27.08594 | -11.38100 | -0.05185 |
| C | 27.69990 | -10.06774 | -0.05182 |
| C | 28.00476 | -9.41140  | 1.18839  |
| C | 28.55408 | -8.07183  | 1.18842  |
| C | 28.84287 | -7.40155  | -0.05178 |
| C | 29.36353 | -6.04631  | -0.05181 |
| C | 29.59816 | -5.35709  | 1.18838  |
| C | 30.09902 | -3.99155  | 1.18834  |
| C | 30.32989 | -3.29269  | -0.05186 |
| C | 30.82637 | -1.92410  | -0.05187 |
| C | 31.04482 | -1.22365  | 1.18833  |

LatticeVectors

31.4159 0.0000 0.0000

0.0000 100.0000 0.0000

0.0000 0.0000 2.480394

$e, y = 20\sin(0.2x)$

|   |          |          |          |
|---|----------|----------|----------|
| C | 0.06315  | 0.12132  | 1.19408  |
| C | 0.25138  | 0.79239  | -0.05186 |
| C | 0.58845  | 2.17097  | -0.05167 |
| C | 0.77359  | 2.85104  | 1.19449  |
| C | 1.11139  | 4.22842  | 1.19515  |
| C | 1.29663  | 4.90819  | -0.05032 |
| C | 1.63402  | 6.28728  | -0.04797 |
| C | 1.82241  | 6.95864  | 1.20003  |
| C | 2.15677  | 8.34069  | 1.21082  |
| C | 2.34227  | 9.01613  | -0.02778 |
| C | 2.68067  | 10.39483 | 0.02823  |
| C | 2.87421  | 11.07510 | 1.28175  |
| C | 3.29499  | 12.43267 | 1.29207  |
| C | 3.51923  | 13.09201 | 0.04804  |
| C | 4.02068  | 14.42443 | 0.05053  |
| C | 4.25277  | 15.08481 | 1.29706  |
| C | 4.74078  | 16.42408 | 1.29768  |
| C | 4.95789  | 17.09995 | 0.05182  |
| C | 5.50335  | 18.41120 | 0.05196  |
| C | 5.90407  | 19.00170 | 1.29797  |
| C | 7.03835  | 19.86603 | 1.29779  |
| C | 7.72267  | 20.05070 | 0.05165  |
| C | 9.12543  | 19.75003 | 0.05097  |
| C | 9.69777  | 19.33621 | 1.29652  |
| C | 10.54125 | 18.19180 | 1.29403  |
| C | 10.83943 | 17.55633 | 0.04602  |
| C | 11.26964 | 16.20464 | 0.03511  |
| C | 11.45554 | 15.53058 | 1.27382  |
| C | 11.79385 | 14.15142 | 1.21842  |
| C | 12.00449 | 13.48576 | -0.03493 |
| C | 12.49548 | 12.15233 | -0.04579 |
| C | 12.70977 | 11.49246 | 1.19832  |
| C | 13.05918 | 10.11924 | 1.19614  |
| C | 13.25014 | 9.44248  | -0.04993 |
| C | 13.66371 | 8.08537  | -0.04809 |
| C | 13.86520 | 7.42066  | 1.19969  |
| C | 14.20567 | 6.04307  | 1.20936  |
| C | 14.38938 | 5.36694  | -0.02976 |
| C | 14.72550 | 3.99044  | 0.02404  |
| C | 14.90985 | 3.30979  | 1.27725  |
| C | 15.24758 | 1.93243  | 1.28682  |
| C | 15.43521 | 1.25932  | 0.04087  |
| C | 15.77117 | -0.12139 | 0.03196  |
| C | 15.95929 | -0.79278 | 1.27116  |
| C | 16.29641 | -2.17104 | 1.21648  |

|   |          |           |          |
|---|----------|-----------|----------|
| C | 16.48152 | -2.85149  | -0.03671 |
| C | 16.81933 | -4.22898  | -0.04664 |
| C | 17.00441 | -4.90896  | 1.19750  |
| C | 17.34187 | -6.28794  | 1.19530  |
| C | 17.53031 | -6.95939  | -0.05117 |
| C | 17.86473 | -8.34130  | -0.05158 |
| C | 18.05039 | -9.01619  | 1.19432  |
| C | 18.38869 | -10.39521 | 1.19439  |
| C | 18.58225 | -11.07514 | -0.05160 |
| C | 19.00297 | -12.43259 | -0.05145 |
| C | 19.22723 | -13.09197 | 1.19453  |
| C | 19.72869 | -14.42427 | 1.19419  |
| C | 19.96071 | -15.08465 | -0.05188 |
| C | 20.44849 | -16.42400 | -0.05190 |
| C | 20.66576 | -17.09980 | 1.19410  |
| C | 21.21124 | -18.41103 | 1.19397  |
| C | 21.61188 | -19.00159 | -0.05213 |
| C | 22.74590 | -19.86595 | -0.05194 |
| C | 23.43022 | -20.05076 | 1.19410  |
| C | 24.83292 | -19.75017 | 1.19419  |
| C | 25.40547 | -19.33640 | -0.05187 |
| C | 26.24902 | -18.19205 | -0.05171 |
| C | 26.54734 | -17.55658 | 1.19430  |
| C | 26.97762 | -16.20501 | 1.19425  |
| C | 27.16357 | -15.53150 | -0.05181 |
| C | 27.50181 | -14.15190 | -0.05182 |
| C | 27.71220 | -13.48619 | 1.19424  |
| C | 28.20330 | -12.15270 | 1.19415  |
| C | 28.41780 | -11.49273 | -0.05187 |
| C | 28.76735 | -10.11949 | -0.05195 |
| C | 28.95822 | -9.44253  | 1.19406  |
| C | 29.37168 | -8.08524  | 1.19409  |
| C | 29.57317 | -7.42032  | -0.05189 |
| C | 29.91354 | -6.04266  | -0.05181 |
| C | 30.09736 | -5.36688  | 1.19416  |
| C | 30.43336 | -3.99008  | 1.19418  |
| C | 30.61780 | -3.30952  | -0.05186 |
| C | 30.95544 | -1.93235  | -0.05188 |
| C | 31.14319 | -1.25913  | 1.19412  |

LatticeVectors

|           |            |          |
|-----------|------------|----------|
| 31.415900 | 0.000000   | 0.000000 |
| 0.000000  | 100.000000 | 0.000000 |
| 0.000000  | 0.000000   | 2.492030 |

$f_y = 10\sin(0.2x)$

|   |         |         |          |
|---|---------|---------|----------|
| C | 0.58564 | 1.17425 | -0.04737 |
| C | 0.58563 | 1.17427 | 1.38891  |
| C | 0.05178 | 0.04937 | 2.10233  |

|   |          |          |          |
|---|----------|----------|----------|
| C | 0.05182  | 0.04942  | 3.54361  |
| C | 1.74095  | 3.38122  | -0.04996 |
| C | 1.74097  | 3.38126  | 1.39140  |
| C | 1.19079  | 2.26301  | 2.10559  |
| C | 1.19078  | 2.26297  | 3.54028  |
| C | 2.97587  | 5.55892  | -0.04712 |
| C | 2.97583  | 5.55884  | 1.38852  |
| C | 2.35600  | 4.46365  | 2.10430  |
| C | 2.35600  | 4.46368  | 3.54162  |
| C | 4.33604  | 7.64658  | -0.04754 |
| C | 4.33602  | 7.64655  | 1.38836  |
| C | 3.61813  | 6.62283  | 2.10197  |
| C | 3.61812  | 6.62281  | 3.54344  |
| C | 6.14057  | 9.33497  | -0.04922 |
| C | 6.14057  | 9.33496  | 1.38922  |
| C | 5.16526  | 8.58087  | 2.10582  |
| C | 5.16522  | 8.58086  | 3.53903  |
| C | 8.54226  | 9.82544  | -0.04375 |
| C | 8.54223  | 9.82547  | 1.38287  |
| C | 7.28448  | 9.83080  | 2.10758  |
| C | 7.28443  | 9.83077  | 3.53639  |
| C | 10.63470 | 8.49353  | -0.05029 |
| C | 10.63469 | 8.49354  | 1.38870  |
| C | 9.68663  | 9.31029  | 2.10120  |
| C | 9.68660  | 9.31029  | 3.54190  |
| C | 12.18933 | 6.52537  | -0.05127 |
| C | 12.18929 | 6.52544  | 1.38949  |
| C | 11.46600 | 7.55062  | 2.10358  |
| C | 11.46601 | 7.55060  | 3.53916  |
| C | 13.46076 | 4.37961  | -0.04909 |
| C | 13.46078 | 4.37971  | 1.38662  |
| C | 12.83461 | 5.46464  | 2.10290  |
| C | 12.83456 | 5.46468  | 3.53943  |
| C | 14.62133 | 2.16927  | -0.04985 |
| C | 14.62131 | 2.16929  | 1.38675  |
| C | 14.07068 | 3.28552  | 2.09982  |
| C | 14.07067 | 3.28551  | 3.54178  |
| C | 15.75974 | -0.04981 | -0.05236 |
| C | 15.75975 | -0.04983 | 1.38895  |
| C | 15.22565 | 1.07777  | 2.10316  |
| C | 15.22562 | 1.07782  | 3.53799  |
| C | 16.89955 | -2.26275 | -0.04882 |
| C | 16.89955 | -2.26274 | 1.38578  |
| C | 16.29391 | -1.17431 | 2.10252  |
| C | 16.29391 | -1.17434 | 3.53873  |
| C | 18.06412 | -4.46350 | -0.04990 |
| C | 18.06415 | -4.46363 | 1.38737  |
| C | 17.44932 | -3.38105 | 2.10007  |
| C | 17.44934 | -3.38105 | 3.54136  |
| C | 19.32605 | -6.62293 | -0.05177 |



|   |          |          |          |
|---|----------|----------|----------|
| C | 19.32610 | -6.62297 | 1.38974  |
| C | 18.68374 | -5.55900 | 2.10335  |
| C | 18.68373 | -5.55893 | 3.53898  |
| C | 20.87325 | -8.58092 | -0.04724 |
| C | 20.87322 | -8.58092 | 1.38595  |
| C | 20.04407 | -7.64664 | 2.10345  |
| C | 20.04405 | -7.64663 | 3.53936  |
| C | 22.99239 | -9.83066 | -0.04489 |
| C | 22.99234 | -9.83063 | 1.38386  |
| C | 21.84857 | -9.33485 | 2.10243  |
| C | 21.84861 | -9.33487 | 3.54083  |
| C | 25.39448 | -9.31040 | -0.05064 |
| C | 25.39447 | -9.31038 | 1.39007  |
| C | 24.25007 | -9.82545 | 2.10847  |
| C | 24.25009 | -9.82546 | 3.53515  |
| C | 27.17384 | -7.55086 | -0.04747 |
| C | 27.17389 | -7.55080 | 1.38800  |
| C | 26.34254 | -8.49370 | 2.10262  |
| C | 26.34259 | -8.49366 | 3.54162  |
| C | 28.54245 | -5.46539 | -0.04753 |
| C | 28.54246 | -5.46536 | 1.38886  |
| C | 27.89720 | -6.52587 | 2.10239  |
| C | 27.89721 | -6.52585 | 3.54306  |
| C | 29.77824 | -3.28630 | -0.05021 |
| C | 29.77824 | -3.28630 | 1.39177  |
| C | 29.16898 | -4.38140 | 2.10514  |
| C | 29.16899 | -4.38140 | 3.54082  |
| C | 30.93350 | -1.07835 | -0.04664 |
| C | 30.93349 | -1.07837 | 1.38831  |
| C | 30.32933 | -2.17044 | 2.10470  |
| C | 30.32936 | -2.17037 | 3.54139  |

LatticeVectors

|           |            |          |
|-----------|------------|----------|
| 31.415900 | 0.000000   | 0.000000 |
| 0.000000  | 100.000000 | 0.000000 |
| 0.000000  | 0.000000   | 4.304417 |

hydride of b

|   |          |          |         |
|---|----------|----------|---------|
| C | 0.05626  | -0.03532 | 1.19663 |
| C | 2.03067  | 2.02197  | 1.19663 |
| C | 3.09028  | 2.96489  | 1.19663 |
| C | 5.52116  | 4.44142  | 1.19663 |
| C | 6.76491  | 5.06357  | 1.19663 |
| C | 9.56671  | 4.73297  | 1.19663 |
| C | 10.85439 | 4.09696  | 1.19664 |
| C | 13.14725 | 2.44071  | 1.19664 |
| C | 14.20677 | 1.49393  | 1.19663 |
| C | 16.26744 | -0.47049 | 1.19663 |
| C | 17.23649 | -1.51235 | 1.19663 |

|   |          |          |         |
|---|----------|----------|---------|
| C | 19.37718 | -3.38306 | 1.19663 |
| C | 20.58255 | -4.11306 | 1.19663 |
| C | 24.63317 | -4.96970 | 1.19663 |
| C | 27.15994 | -3.71576 | 1.19663 |
| C | 28.31466 | -2.87956 | 1.19663 |
| C | 30.42847 | -1.00428 | 1.19663 |
| C | 0.55913  | 0.47014  | 2.44529 |
| C | 1.52843  | 1.51231  | 2.44530 |
| C | 3.66834  | 3.38348  | 2.44529 |
| C | 4.87404  | 4.11302  | 2.44529 |
| C | 8.92486  | 4.97073  | 2.44530 |
| C | 11.45157 | 3.71596  | 2.44529 |
| C | 12.60663 | 2.87963  | 2.44530 |
| C | 14.72039 | 1.00434  | 2.44529 |
| C | 15.76405 | 0.03541  | 2.44529 |
| C | 17.73890 | -2.02210 | 2.44529 |
| C | 18.79853 | -2.96454 | 2.44530 |
| C | 21.22946 | -4.44146 | 2.44529 |
| C | 22.47321 | -5.06400 | 2.44530 |
| C | 25.27453 | -4.73282 | 2.44530 |
| C | 26.56247 | -4.09694 | 2.44529 |
| C | 28.85510 | -2.44078 | 2.44529 |
| C | 29.91474 | -1.49392 | 2.44530 |
| C | 7.47678  | 5.47269  | 2.44529 |
| C | 23.18515 | -5.47235 | 1.19662 |
| H | 7.52417  | 6.60752  | 2.44528 |
| H | 23.23549 | -6.60722 | 1.19660 |

LatticeVectors

31.4159 0.0000 0.0000  
0.0000 100.0000 0.0000  
0.0000 0.0000 2.497322

hydride of c

|   |          |         |         |
|---|----------|---------|---------|
| C | 0.05122  | 0.13143 | 1.29701 |
| C | 0.37516  | 0.77365 | 0.05183 |
| C | 1.08164  | 2.02703 | 0.05185 |
| C | 1.42239  | 2.65507 | 1.29700 |
| C | 2.13198  | 3.90307 | 1.29700 |
| C | 2.46592  | 4.53399 | 0.05185 |
| C | 3.16836  | 5.78299 | 0.05184 |
| C | 3.51797  | 6.40665 | 1.29701 |
| C | 4.36450  | 7.55816 | 1.29701 |
| C | 4.88028  | 8.07054 | 0.05184 |
| C | 6.04229  | 8.90216 | 0.05190 |
| C | 6.71536  | 9.22201 | 1.29704 |
| C | 8.01828  | 9.73953 | 1.29715 |
| C | 8.83059  | 9.92221 | 0.05204 |
| C | 10.00090 | 8.90413 | 0.05190 |

|   |          |           |         |
|---|----------|-----------|---------|
| C | 10.50050 | 8.40621   | 1.29705 |
| C | 11.46395 | 7.32885   | 1.29704 |
| C | 11.88929 | 6.75396   | 0.05188 |
| C | 12.70390 | 5.56886   | 0.05190 |
| C | 13.05234 | 4.94753   | 1.29706 |
| C | 13.76601 | 3.69868   | 1.29709 |
| C | 14.10416 | 3.07029   | 0.05191 |
| C | 14.80939 | 1.81441   | 0.05193 |
| C | 15.13241 | 1.17327   | 1.29708 |
| C | 15.75962 | -0.13103  | 1.29709 |
| C | 16.08266 | -0.77239  | 0.05194 |
| C | 16.78950 | -2.02707  | 0.05195 |
| C | 17.12970 | -2.65413  | 1.29709 |
| C | 17.84040 | -3.90342  | 1.29710 |
| C | 18.17348 | -4.53228  | 0.05190 |
| C | 18.87721 | -5.78263  | 0.05190 |
| C | 19.22351 | -6.40271  | 1.29704 |
| C | 20.07523 | -7.55635  | 1.29702 |
| C | 20.57901 | -8.06362  | 0.05188 |
| C | 21.73801 | -8.92691  | 0.05187 |
| C | 22.33595 | -9.30092  | 1.29705 |
| C | 23.72829 | -9.94847  | 1.29715 |
| C | 24.44653 | -9.54404  | 0.05197 |
| C | 25.57210 | -8.71822  | 0.05187 |
| C | 26.13605 | -8.26514  | 1.29704 |
| C | 27.14321 | -7.26204  | 1.29698 |
| C | 27.59919 | -6.71809  | 0.05185 |
| C | 28.42304 | -5.55952  | 0.05181 |
| C | 28.77304 | -4.94104  | 1.29695 |
| C | 29.47761 | -3.69587  | 1.29700 |
| C | 29.81561 | -3.06710  | 0.05178 |
| C | 30.51757 | -1.81289  | 0.05185 |
| C | 30.84057 | -1.17035  | 1.29698 |
| H | 9.28696  | 10.95357  | 0.05337 |
| H | 23.57971 | -11.06835 | 1.29827 |

LatticeVectors

|           |            |          |
|-----------|------------|----------|
| 31.415900 | 0.000000   | 0.000000 |
| 0.000000  | 100.000000 | 0.000000 |
| 0.000000  | 0.000000   | 2.490319 |

hydride of d

|   |            |            |             |
|---|------------|------------|-------------|
| C | 0.05449422 | 0.16445831 | 1.19152046  |
| C | 0.27085254 | 0.85643762 | -0.05180689 |
| C | 0.76816093 | 2.20977711 | -0.05181558 |
| C | 1.00582182 | 2.88181471 | 1.19152054  |
| C | 1.50848857 | 4.23164514 | 1.19151953  |
| C | 1.73694026 | 4.91748036 | -0.05181192 |
| C | 2.2396338  | 6.26554735 | -0.05180236 |
| C | 2.47531496 | 6.93820161 | 1.19151502  |

|   |             |              |             |
|---|-------------|--------------|-------------|
| C | 2.97065376  | 8.28775488   | 1.19152404  |
| C | 3.18637163  | 8.9751134    | -0.05180896 |
| C | 3.62608881  | 10.33702477  | -0.05180035 |
| C | 3.90837831  | 10.99288006  | 1.19151477  |
| C | 4.56168301  | 12.25777098  | 1.19151957  |
| C | 4.98133237  | 12.84787413  | -0.05180803 |
| C | 6.02261136  | 13.81297681  | -0.05180451 |
| C | 6.64542669  | 14.20404422  | 1.19151902  |
| C | 7.93085141  | 14.74030634  | 1.19152044  |
| C | 8.7467797   | 14.84513058  | -0.05180195 |
| C | 9.79106782  | 13.69583193  | -0.0518047  |
| C | 10.21803649 | 13.13904266  | 1.19151796  |
| C | 11.0319072  | 11.92599572  | 1.19152062  |
| C | 11.36832984 | 11.29080227  | -0.05180634 |
| C | 11.99334047 | 9.97933212   | -0.05180065 |
| C | 12.29378507 | 9.322427     | 1.19151608  |
| C | 12.84206819 | 7.98659266   | 1.19152751  |
| C | 13.13373476 | 7.33009887   | -0.0518091  |
| C | 13.65765504 | 5.98447669   | -0.05180381 |
| C | 13.89111247 | 5.30045532   | 1.1915161   |
| C | 14.38655944 | 3.94353191   | 1.19152027  |
| C | 14.60737034 | 3.26265702   | -0.05180652 |
| C | 15.03169332 | 1.88293193   | -0.05180441 |
| C | 15.25080751 | 1.19345503   | 1.19151966  |
| C | 15.74714267 | -0.16828732  | 1.19152002  |
| C | 15.9775791  | -0.8604877   | -0.0518057  |
| C | 16.48042477 | -2.21863506  | -0.051805   |
| C | 16.71646715 | -2.89594531  | 1.19151888  |
| C | 17.21761246 | -4.25503396  | 1.19151984  |
| C | 17.44707285 | -4.94584871  | -0.05180485 |
| C | 17.94693054 | -6.30884372  | -0.05180584 |
| C | 18.17820138 | -7.00107454  | 1.19151892  |
| C | 18.70017895 | -8.35263491  | 1.19152166  |
| C | 18.9878789  | -9.01569287  | -0.0518053  |
| C | 19.50911753 | -10.36372912 | -0.05180547 |
| C | 19.75100945 | -11.04151518 | 1.19151964  |
| C | 20.38061274 | -12.34369908 | 1.19151934  |
| C | 20.78340256 | -12.94623344 | -0.05180708 |
| C | 21.79281691 | -13.99250284 | -0.05180521 |
| C | 22.35292559 | -14.41230825 | 1.19152103  |
| C | 23.74561678 | -15.06541078 | 1.19151902  |
| C | 24.44745086 | -14.62835661 | -0.05180469 |
| C | 25.40884173 | -13.60887087 | -0.05180439 |
| C | 25.90961436 | -13.06917868 | 1.19152111  |
| C | 26.74091273 | -11.91089498 | 1.19152201  |
| C | 27.08356605 | -11.27336949 | -0.05180406 |
| C | 27.70286529 | -9.97128301  | -0.05180332 |
| C | 28.00431897 | -9.31488184  | 1.19151187  |
| C | 28.55109294 | -7.98197724  | 1.19152219  |
| C | 28.8428998  | -7.32354796  | -0.0518129  |

|                |             |              |             |
|----------------|-------------|--------------|-------------|
| C              | 29.3642942  | -5.97725112  | -0.05182476 |
| C              | 29.59411195 | -5.2881192   | 1.19149196  |
| C              | 30.09582503 | -3.93480244  | 1.19151911  |
| C              | 30.33294644 | -3.26103103  | -0.05180451 |
| C              | 30.830247   | -1.90597496  | -0.05180394 |
| C              | 31.0463759  | -1.21241666  | 1.19152018  |
| H              | 9.31915545  | 15.81578651  | -0.05180977 |
| H              | 23.63032026 | -16.18553399 | 1.19152012  |
| LatticeVectors |             |              |             |
| 31.415900      | 0.000000    | 0.000000     |             |
| 0.000000       | 100.000000  | 0.000000     |             |
| 0.000000       | 0.000000    | 2.486650     |             |

### hydride of e

|   |             |              |            |
|---|-------------|--------------|------------|
| C | 0.06562377  | -0.18051173  | 3.68811491 |
| C | 0.24999377  | -0.86563043  | 2.44145612 |
| C | 0.58793855  | -2.24676287  | 2.44159804 |
| C | 0.77351611  | -2.92918717  | 3.6883573  |
| C | 1.10969368  | -4.31148308  | 3.68888693 |
| C | 1.29758572  | -4.98652217  | 2.44273917 |
| C | 1.63287244  | -6.37064089  | 2.44517356 |
| C | 1.82177901  | -7.04501752  | 3.69379915 |
| C | 2.15788038  | -8.42746527  | 3.70431824 |
| C | 2.34137047  | -9.11008929  | 2.4651743  |
| C | 2.68048982  | -10.48996026 | 2.52127173 |
| C | 2.87455793  | -11.17281657 | 3.77562133 |
| C | 3.29419977  | -12.53192147 | 3.78604488 |
| C | 3.51757701  | -13.19261483 | 2.54143003 |
| C | 4.01520291  | -14.52591346 | 2.54392667 |
| C | 4.24892442  | -15.18637501 | 3.79112343 |
| C | 4.77202862  | -16.50939995 | 3.79153564 |
| C | 5.07350605  | -17.15371139 | 2.54512994 |
| C | 5.72404005  | -18.41499006 | 2.5451287  |
| C | 6.12850441  | -19.02553356 | 3.79185886 |
| C | 6.9795669   | -20.14652427 | 3.79170916 |
| C | 7.69881541  | -20.56131933 | 2.54497084 |
| C | 9.04810831  | -19.76638199 | 2.54428219 |
| C | 9.57931232  | -19.31521573 | 3.79044613 |
| C | 10.49772798 | -18.19341019 | 3.78800981 |
| C | 10.82354155 | -17.5672191  | 2.53925367 |
| C | 11.27343091 | -16.21458661 | 2.52823371 |
| C | 11.4587395  | -15.54049625 | 3.76757572 |
| C | 11.79525549 | -14.15543929 | 3.71217646 |
| C | 12.00579242 | -13.48607103 | 2.45809822 |
| C | 12.49547061 | -12.14647356 | 2.44749123 |
| C | 12.70897332 | -11.48125295 | 3.69230193 |
| C | 13.05725949 | -10.10107516 | 3.69043415 |
| C | 13.2513975  | -9.42608995  | 2.44366596 |

|   |             |             |            |
|---|-------------|-------------|------------|
| C | 13.66503551 | -8.06406601 | 2.4453089  |
| C | 13.86299524 | -7.38620341 | 3.69375526 |
| C | 14.20329    | -6.00445013 | 3.70378604 |
| C | 14.3896068  | -5.3294409  | 2.46408287 |
| C | 14.72387713 | -3.94474605 | 2.5178271  |
| C | 14.91193072 | -3.26971722 | 3.77152495 |
| C | 15.24906553 | -1.88701987 | 3.78090264 |
| C | 15.43469037 | -1.20502481 | 2.53432958 |
| C | 15.77271962 | 0.17646811  | 2.52514483 |
| C | 15.95721024 | 0.86171522  | 3.76449757 |
| C | 16.2950717  | 2.24272096  | 3.71007417 |
| C | 16.48102312 | 2.92342576  | 2.45632572 |
| C | 16.81770976 | 4.30670432  | 2.44665092 |
| C | 17.00639552 | 4.98001926  | 3.69152811 |
| C | 17.34236775 | 6.36418563  | 3.68928827 |
| C | 17.53001685 | 7.03953798  | 2.44220745 |
| C | 17.86588365 | 8.42234053  | 2.44175255 |
| C | 18.04945691 | 9.1054116   | 3.68828292 |
| C | 18.38845117 | 10.48643888 | 3.68812402 |
| C | 18.5821355  | 11.16775042 | 2.44144064 |
| C | 19.00145761 | 12.528428   | 2.44139462 |
| C | 19.22390121 | 13.18875104 | 3.68804097 |
| C | 19.7220439  | 14.52339336 | 3.68804659 |
| C | 19.95589474 | 15.17878842 | 2.44138096 |
| C | 20.48022572 | 16.50586993 | 2.44137602 |
| C | 20.77625595 | 17.14115393 | 3.68802899 |
| C | 21.41480596 | 18.42471625 | 3.68804017 |
| C | 21.74620331 | 19.02833763 | 2.4413717  |
| C | 22.67491402 | 20.26409951 | 2.44137868 |
| C | 23.49324597 | 20.18671085 | 3.6880377  |
| C | 24.76977844 | 19.63487982 | 3.68803924 |
| C | 25.38109126 | 19.23538972 | 2.44137905 |
| C | 26.32504451 | 18.18384714 | 2.44137871 |
| C | 26.6526191  | 17.55609991 | 3.68804055 |
| C | 27.06542781 | 16.20264895 | 3.68804743 |
| C | 27.186996   | 15.51160251 | 2.44137919 |
| C | 27.5008222  | 14.13118187 | 2.44138105 |
| C | 27.71277218 | 13.46844159 | 3.68803801 |
| C | 28.20530144 | 12.13531871 | 3.6880499  |
| C | 28.41786239 | 11.46778908 | 2.44137281 |
| C | 28.76501487 | 10.0894445  | 2.44137839 |
| C | 28.96020645 | 9.4177284   | 3.6880464  |
| C | 29.37342143 | 8.0566244   | 3.68803335 |
| C | 29.57071516 | 7.37638647  | 2.44137869 |
| C | 29.91144757 | 5.99612167  | 2.44137885 |
| C | 30.09683774 | 5.31954674  | 3.68803786 |
| C | 30.43107343 | 3.93540416  | 3.68804718 |
| C | 30.619747   | 3.26264958  | 2.44137765 |
| C | 30.95639065 | 1.87966944  | 2.44138452 |
| C | 31.14315311 | 1.20043485  | 3.68806075 |

```
H 7.90921162 -21.66274271 2.54507977
H 22.0421834 21.1932713 2.44137854
LatticeVectors
31.415900 0.000000 0.000000
0.000000 100.000000 0.000000
0.000000 0.000000 2.493322
```
